# Supplementary material for: The Impact of Probiotic Bifidobacterium on Liver Diseases and the Microbiota
Source: MDPI journal article supplement (doi:10.3390/life14020239), 2024-02-08
Supplement: s1 [file s1]

## Search strategy

### PubMed - 183 (English, 2013-2023)

(Non-alcoholic Fatty Liver Disease[Mesh] OR NAFLD[tiab] OR NASH[tiab] MAFLD[tiab] OR Nonalcoholic Steatohepat\*[tiab] OR Non-alcoholic Steatohepat\*[tiab] OR Fatty Liver\*[tiab] OR Hepatic Steatos\*[tiab] OR Liver Diseases, Alcoholic[Mesh] OR Alcoholic Liver Disease\*[tiab] OR Alcoholic Steatohepat\*[tiab] OR Alcoholic Hepat\*[tiab] OR Alcoholic Cirrhos\*[tiab] OR Liver Cirrhosis[Mesh] OR Liver Cirrhos\*[tiab] OR Hepatic Cirrhos\*[tiab] OR Metabolic dysfunction-associated fatty liver disease\*[tiab] OR Metabolic associated fatty liver disease\*[tiab] OR Metabolic-associated fatty liver disease\*[tiab] OR Carcinoma, Hepatocellular[Mesh] OR Hepatocellular Carcinoma\*[tiab] OR Hepatocellular Cancer\*[tiab] OR HCC[tiab] OR Liver Cancer\*[tiab] OR Liver Cell Carcinoma\*[tiab])  
AND  
(Bifidobacterium\*[tiab])

### Embase – 192 (English, 2013-2023)

('nonalcoholic fatty liver'/exp OR 'alcohol liver disease'/exp OR 'liver cirrhosis'/de OR 'liver cell carcinoma'/exp OR (NAFLD OR NASH OR MAFLD OR 'Nonalcoholic Steatohepat\*' OR 'Non-alcoholic Steatohepat\*' OR 'Fatty Liver\*' OR 'Hepatic Steatos\*' OR 'Alcoholic Liver Disease\*' OR 'Alcoholic Steatohepat\*' OR 'Alcoholic Hepat\*' OR 'Alcoholic Cirrhos\*' OR 'Liver Cirrhos\*' OR 'Hepatic Cirrhos\*' OR 'Metabolic dysfunction-associated fatty liver disease\*' OR 'Metabolic associated fatty liver disease\*' OR 'Metabolic-associated fatty liver disease\*' OR 'Hepatocellular Carcinoma\*' OR 'Hepatocellular Cancer\*' OR HCC OR 'Liver Cancer\*' OR 'Liver Cell Carcinoma\*'):ti,ab,kw)  
AND  
(Bifidobacterium\*:ti,ab,kw)  
AND  
[embase]/lim NOT ([embase]/lim AND [medline]/lim)

### Web of Science – 273 (English, 2013-2023)

TS=(NAFLD OR NASH OR MAFLD OR "Nonalcoholic Steatohepat\*" OR "Non-alcoholic Steatohepat\*" OR "Fatty Liver\*" OR "Hepatic Steatos\*" OR "Alcoholic Liver Disease\*" OR "Alcoholic Steatohepat\*" OR "Alcoholic Hepat\*" OR "Alcoholic Cirrhos\*" OR "Liver Cirrhos\*" OR "Hepatic Cirrhos\*" OR "Metabolic dysfunction-associated fatty liver disease\*" OR "Metabolic associated fatty liver disease\*" OR "Metabolic-associated fatty liver disease\*" OR "Hepatocellular Carcinoma\*" OR "Hepatocellular Cancer\*" OR HCC OR "Liver Cancer\*" OR "Liver Cell Carcinoma\*")  
AND  
TS=(Bifidobacterium\*)
